# Supplementary material for: Caffeoylglycolic acid methyl ester, a major constituent of sorghum, exhibits anti-inflammatory activity via the Nrf2/heme oxygenase-1 pathway
Source: Royal Society of Chemistry journal article supplement (doi:10.1039/c4ra13847c), 2015-01-01
Supplement: c4ra13847c1.pdf [file c4ra13847c1.pdf]

## Supplementary Data 1

- 1)  $^1\text{H}$  NMR spectrum of caffeoylglycolic acid methyl ester
- 2)  $^{13}\text{C}$  NMR spectrum of caffeoylglycolic acid methyl ester
- 3)  $^1\text{H}$  NMR spectrum of 1-*O*-caffeoylglycerol
- 4)  $^{13}\text{C}$  NMR spectrum of 1-*O*-caffeoylglycerol

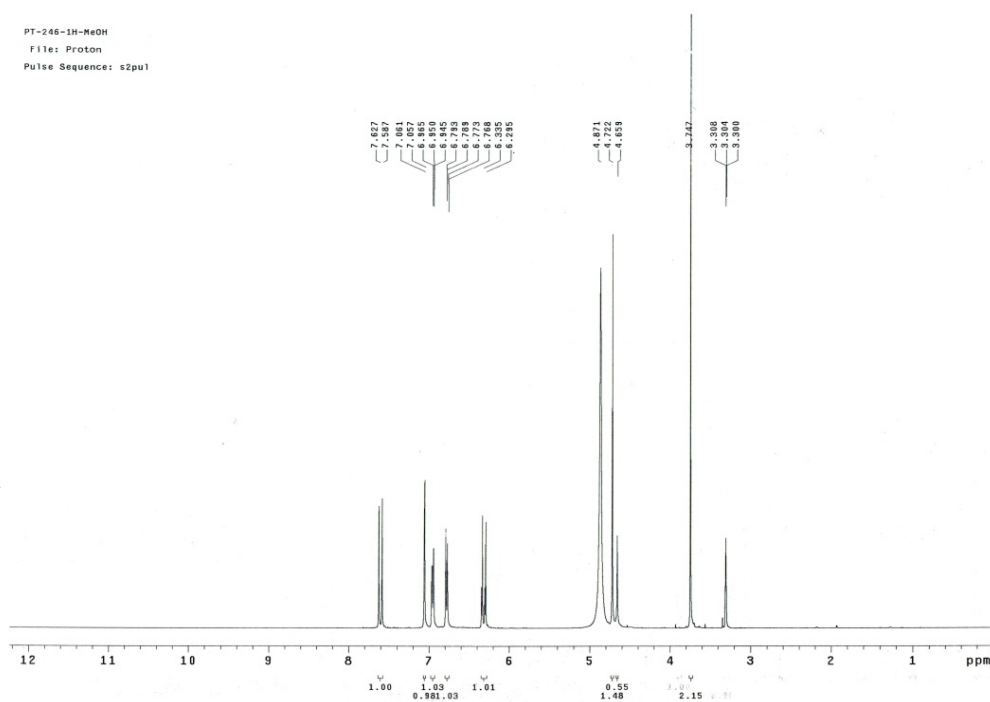

1)  $^1\text{H}$  NMR spectrum of caffeoylglycolic acid methyl ester

PT-246-13C-MeOH  
File: Carbon  
Pulse Sequence: s2pu1

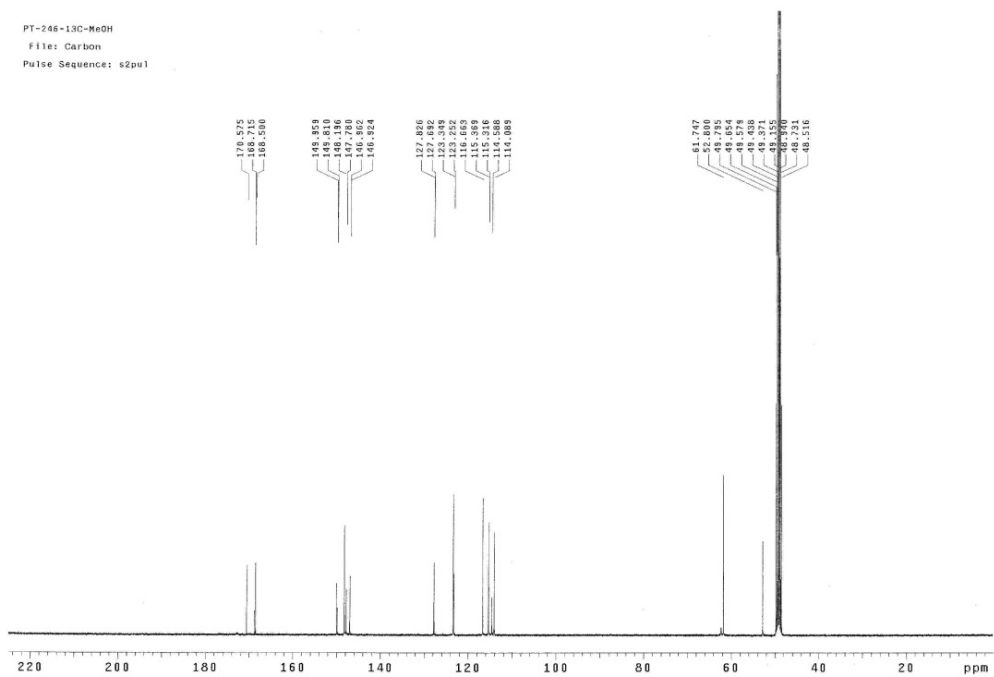

2)  $^{13}\text{C}$  NMR spectrum of caffeoylglycolic acid methyl ester

SB-4.11.2-1H-MeOH-400  
File: SB-4.11.2-1H-MeOH-20130718  
Pulse Sequence: e2pu1

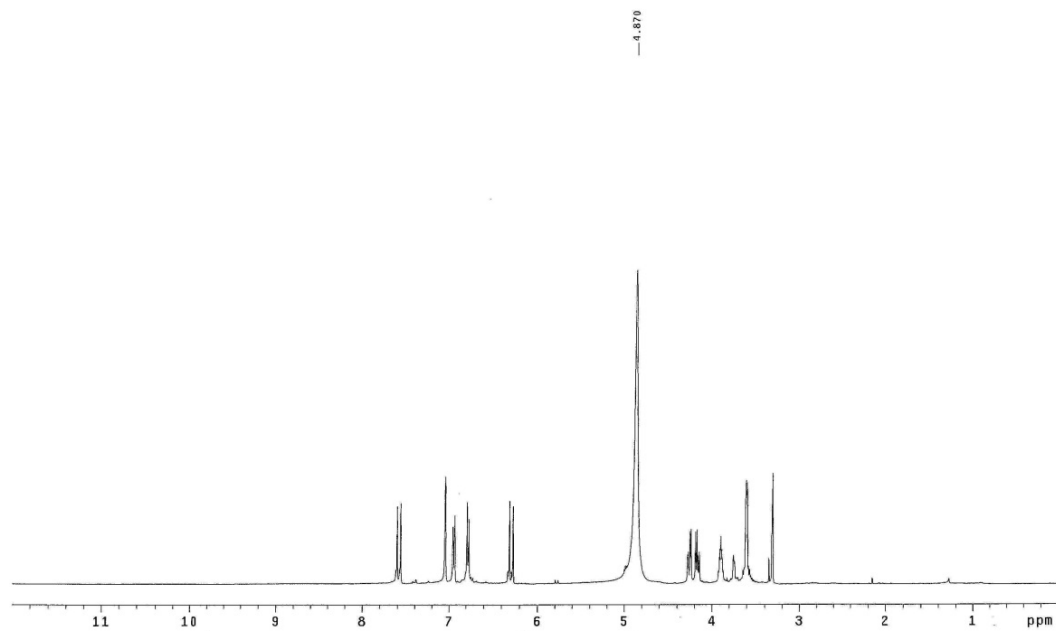

**3)  $^1\text{H}$  NMR spectrum of 1-O-caffeoylglycerol**

S8-4.11.2-13C-MeOH  
File: Carbon  
Pulse Sequence: s2pu1

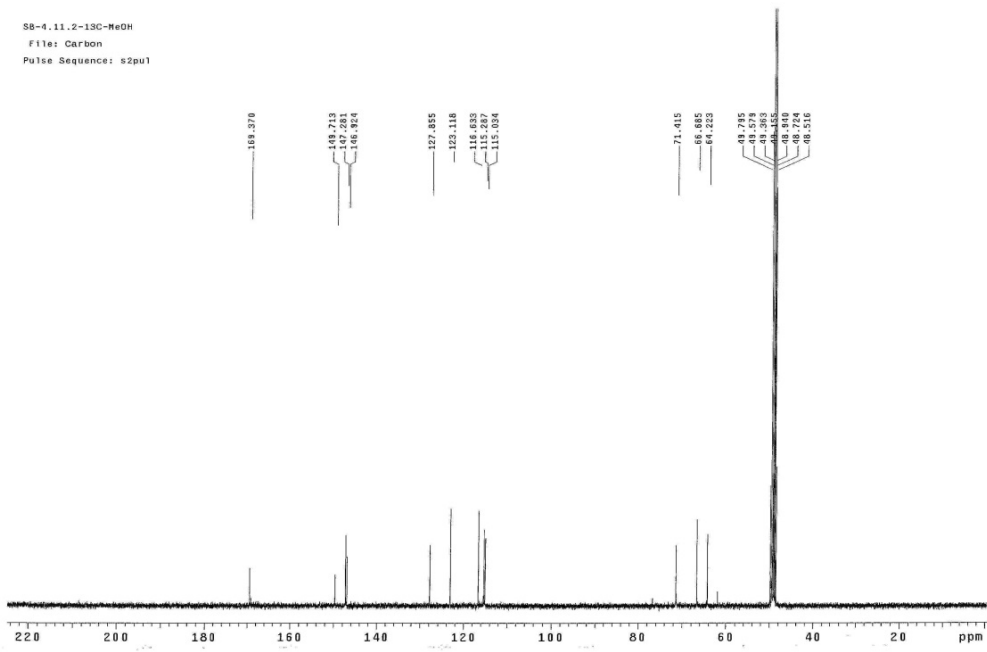

4)  $^{13}\text{C}$  NMR spectrum of 1-O-caffeoylglycerol
